# Supplementary material for: Integrated proteomic platforms for the comparative characterization of medulloblastoma and pilocytic astrocytoma pediatric brain tumors: a preliminary study
Source: Royal Society of Chemistry journal article supplement (doi:10.1039/c5mb00076a), 2015-04-24
Supplement: c5mb00076a2.xlsx [file c5mb00076a2.xlsx]

## Sheet: Sheet1
					Modifications	Pilocytic Astrocytoma (PA)					Medulloblastoma (MB)
Sequence	Protein Group Accessions	MH+ [Da]	# Proteins	# Protein Groups		Confidence	Xcorr	m/z [Da]	Charge	RT [min]	Confidence	Xcorr	m/z [Da]	Charge	RT [min]
MPCAEDYLSVVLNQLCVLHEK	P02768	2518.22	1	1	C3(Carbamidomethyl); C16(Carbamidomethyl)	High	8.96946	840.077	3	37.1385	High	7.62514	840.077	3	37.21
KVADALTNAVAHVDDMPNALSALSDLHAHK	P69905	3124.59	1	1		High	8.85806	781.902	4	31.1647	High	9.1683	781.902	4	31.1233
VHTECCHGDLLECADDRADLAK	P02768	2585.12	1	1	C5(Carbamidomethyl); C6(Carbamidomethyl); C13(Carbamidomethyl)	High	7.94001	862.377	3	19.9415	High	7.50206	862.377	3	19.965
SCDKTHTCPPCPAPELLGGPSVFLFPPKPK	P01857	3334.64	1	1	C2(Carbamidomethyl); C8(Carbamidomethyl); C11(Carbamidomethyl)	High	7.70388	834.417	4	29.9431
RMPCAEDYLSVVLNQLCVLHEK	P02768	2674.32	1	1	C4(Carbamidomethyl); C17(Carbamidomethyl)	High	7.67302	892.111	3	36.1288	High	7.1591	892.11	3	36.1139
VADALTNAVAHVDDMPNALSALSDLHAHK	P69905	2996.49	1	1		High	7.40938	600.104	5	31.7645	High	7.64607	999.502	3	31.8427
VIHDNFGIVEGLMTTVHAITATQK	P04406	2595.36	1	1		High	7.19179	865.792	3	36.7593	High	6.61909	865.791	3	36.8559
SHCIAEVENDEMPADLPSLAADFVESK	P02768	2974.35	1	1	C3(Carbamidomethyl)	High	7.06272	992.121	3	32.9286	High	7.09895	992.121	3	32.6816
FFESFGDLSTPDAVMGNPK	P68871	2058.95	1	1		High	6.78714	686.987	3	28.8837	High	6.75764	686.988	3	28.9047
KVLGAFSDGLAHLDNLK	P68871	1797.99	1	1		High	6.72188	600.001	3	26.8675	High	6.71366	600	3	26.8584
LVRPEVDVMCTAFHDNEETFLKK	P02768	2778.36	1	1	C10(Carbamidomethyl)	High	6.61216	556.478	5	27.1595	High	6.38711	695.345	4	27.2715
MPCAEDYLSVVLNQLCVLHEKTPVSDR	P02768	3173.55	1	1	C3(Carbamidomethyl); C16(Carbamidomethyl)	High	6.54299	794.142	4	36.1785
VFDEFKPLVEEPQNLIK	P02768	2045.1	1	1		High	6.31928	682.37	3	28.9278	High	6.42873	682.371	3	29.0212
ALVLIAFAQYLQQCPFEDHVK	P02768	2490.29	1	1	C14(Carbamidomethyl)	High	6.3177	623.328	4	38.0983	High	5.42072	830.766	3	38.088
KLHEEEIQELQAQIQEQHVQIDVDVSKPDLTAALR	P08670	4051.12	1	1		High	6.28287	811.029	5	28.2478
KDLYANTVLSGGTTMYPGIADR	P60709	2343.16	2	1		High	6.26428	781.727	3	25.3967	High	6.36869	781.726	3	25.413
KVPQVSTPTLVEVSR	P02768	1639.94	1	1		High	6.23206	547.318	3	21.5036	High	6.20502	547.317	3	21.6852
SAVTALWGKVNVDEVGGEALGR	P68871	2228.17	1	1		High	6.22744	743.394	3	28.8668
QNCELFEQLGEYKFQNALLVR	P02768	2599.3	1	1	C3(Carbamidomethyl)	High	6.21806	867.105	3	31.6063	High	5.81895	867.105	3	31.6171
YKAAFTECCQAADK	P02768	1662.72	1	1	C8(Carbamidomethyl); C9(Carbamidomethyl)	High	5.86562	554.913	3	16.0437
LVRPEVDVMCTAFHDNEETFLK	P02768	2650.27	1	1	C10(Carbamidomethyl)	High	5.84607	663.323	4	28.3058	High	4.95166	663.322	4	28.5174
SLHTLFGDKLCTVATLR	P02768	1932.04	1	1	C11(Carbamidomethyl)	High	5.75748	966.523	2	27.0238	High	5.24026	644.684	3	27.0632
VGAHAGEYGAEALER	P69905	1529.73	1	1		High	5.75439	510.583	3	17.6375	High	5.78356	510.583	3	17.6185
HLREYQDLLNVK	P08670	1527.83	1	1		High	5.7353	509.947	3	22.1007
RHPYFYAPELLFFAK	P02768	1899	1	1		High	5.73306	633.67	3	33.1263	High	5.50543	633.67	3	33.0617
LEVERDNLAQDLATVR	P14136	1841.97	1	1		High	5.70185	614.662	3	24.7761	High	4.65655	614.662	3	24.8294
ALVLIAFAQYLQQCPFEDHVKLVNEVTEFAK	P02768	3620.89	1	1	C14(Carbamidomethyl)	High	5.66593	905.977	4	39.8881
RHPDYSVVLLLR	P02768	1467.84	1	1		High	5.61542	489.952	3	26.5717	High	5.26402	489.953	3	26.5885
VAPEEHPVLLTEAPLNPK	P60709	1954.06	2	1		High	5.45251	652.026	3	23.4393	High	5.38757	652.027	3	23.5417
VFDEFKPLVEEPQNLIKQNCELFEQLGEYK	P02768	3683.83	1	1	C20(Carbamidomethyl)	High	5.42321	921.714	4	35.0827
CCTESLVNRRPCFSALEVDETYVPK	P02768	3030.41	1	1	C1(Carbamidomethyl); C2(Carbamidomethyl); C12(Carbamidomethyl)	High	5.42081	758.359	4	25.6718
HKVYACEVTHQGLSSPVTK	P01834	2141.08	1	1	C6(Carbamidomethyl)	High	5.35998	536.025	4	16.6302
VTIAQGGVLPNIQAVLLPK	Q16777	1931.17	7	1		High	5.34189	966.088	2	32.4722	High	5.76669	966.089	2	32.4099
TPEVTCVVVDVSHEDPEVKFNWYVDGVEVHNAK	P01857	3797.81	1	1	C6(Carbamidomethyl)	High	5.247	760.369	5	29.47
VNVDEVGGEALGR	P68871	1314.66	1	1		High	5.22218	657.835	2	20.3133	High	5.20715	657.836	2	20.1875
TCVADESAENCDK	P02768	1498.58	1	1	C2(Carbamidomethyl); C11(Carbamidomethyl)	High	5.20002	749.792	2	10.9988	High	4.57103	749.793	2	11.2546
TQYEAMASSNMHEAEEWYR	P14136	2332.96	1	1		High	5.19212	778.325	3	24.7012
LTTPTYGDLNHLVSATMSGVTTCLR	P68371;P07437;Q13885	2708.34	4	3	C23(Carbamidomethyl)	High	5.18774	903.452	3	33.5747	High	6.08371	903.451	3	33.3832
DYFPEPVTVSWNSGALTSGVHTFPAVLQSSGLYSLSSVVTVPSSSLGTQTYICNVNHKPSNTKVDK	P01857	7055.51	1	1	C53(Carbamidomethyl)	High	5.16827	1176.76	6	35.0595
NLNEKDYELLCLDGTR	P02787	1952.94	1	1	C11(Carbamidomethyl)	High	5.13647	651.651	3	25.0715	High	4.04532	651.651	3	25.1219
LEEEGQSLKDEMAR	P14136	1634.77	1	1		High	5.05303	817.888	2	18.1482
AAFTECCQAADKAACLLPK	P02768	2124.99	1	1	C6(Carbamidomethyl); C7(Carbamidomethyl); C15(Carbamidomethyl)	High	5.02807	709.001	3	24.2773
AVFVDLEPTVIDEVR	Q71U36	1701.91	1	1		High	4.97278	851.457	2	29.5432	High	5.59078	851.457	2	29.5374
IKWGDAGAEYVVESTGVFTTMEK	P04406	2518.22	1	1		High	4.96274	840.078	3	30.839	High	5.36653	840.078	3	30.8697
VAPDEHPILLTEAPLNPK		1954.06	0	0		High	4.95166	652.026	3	23.4393	High	4.92586	652.027	3	23.4522
SYELPDGQVITIGNER	P60709	1790.89	2	1		High	4.91397	895.95	2	26.3302	High	5.2964	895.95	2	26.2308
LKECCEKPLLEK	P02768	1546.8	1	1	C4(Carbamidomethyl); C5(Carbamidomethyl)	High	4.90942	773.901	2	15.6725	High	4.45194	387.455	4	15.658
VEVERDNLAEDIMR	P08670	1688.83	1	1		High	4.90014	563.614	3	23.8918
LEAENNLAAYRQEADEATLAR	P14136	2348.15	1	1		High	4.88154	783.387	3	23.1912
HLQEYQDLLNVK	P14136	1499.79	1	1		High	4.85224	500.6	3	23.7537
LISWYDNEFGYSNR	P04406	1763.8	1	1		High	4.84123	882.406	2	27.8068	High	4.82551	882.405	2	27.7749
RPCFSALEVDETYVPK	P02768	1910.93	1	1	C3(Carbamidomethyl)	High	4.81646	637.649	3	24.7878	High	4.97057	637.649	3	24.7847
ILLAELEQLKGQGK	P08670	1539.91	1	1		High	4.76513	770.459	2	26.0892
IISNASCTTNCLAPLAK	P04406	1833.92	1	1	C7(Carbamidomethyl); C11(Carbamidomethyl)	High	4.7244	917.464	2	20.9645	High	4.60306	917.464	2	21.0594
QNCELFEQLGEYK	P02768	1657.75	1	1	C3(Carbamidomethyl)	High	4.66922	829.38	2	26.5229	High	4.72109	829.38	2	26.5194
VVAGVANALAHKYH	P68871	1449.8	1	1		High	4.66774	725.401	2	19.531	High	4.54558	725.401	2	19.5104
VYACEVTHQGLSSPVTK	P01834	1875.93	1	1	C4(Carbamidomethyl)	High	4.64526	625.98	3	18.5428
LALDLEIATYR	P14136	1277.71	1	1		High	4.4909	639.359	2	27.7651
TPEVTCVVVDVSHEDPEVK	P01857	2139.03	1	1	C6(Carbamidomethyl)	High	4.4749	713.681	3	24.4793
SAGWNIPIGLLYCDLPEPR	P02787	2171.1	1	1	C13(Carbamidomethyl)	High	4.43799	1086.05	2	34.9835
KPVDEYKDCHLAQVPSHTVVAR	P02787	2549.29	1	1	C9(Carbamidomethyl)	High	4.43423	638.079	4	17.864
MYLGYEYVTAIR	P02787	1478.74	1	1		High	4.43134	739.872	2	27.7138
QVQSLTCEVDALKGTNESLER	P08670	2377.17	1	1	C7(Carbamidomethyl)	High	4.39225	793.061	3	24.6332
AGYTDKVVIGMDVAASEFFR	P06733	2176.08	1	1		High	4.37689	726.03	3	34.0782
SKFADLTDAAAR	P14136	1265.65	1	1		High	4.34477	633.327	2	19.1152
GTFATLSELHCDKLHVDPENFR	P68871	2586.24	1	1	C11(Carbamidomethyl)	High	4.33969	647.316	4	25.4481	High	4.33561	647.316	4	25.3746
AVMDDFAAFVEK	P02768	1342.64	1	1		High	4.27812	671.822	2	29.2937	High	4.30319	671.822	2	29.2945
LADVYQAELR	P14136	1177.62	1	1		High	4.24289	589.314	2	20.6561	High	3.97614	589.314	2	20.7597
STSGGTAALGCLVK	P01857	1321.68	1	1	C11(Carbamidomethyl)	High	4.19899	661.343	2	21.528
ALAAELNQLR	P14136	1098.63	1	1		High	4.14343	549.817	2	22.7761
GALQNIIPASTGAAK	P04406	1411.79	1	1		High	4.14168	706.398	2	22.677	High	4.08492	706.398	2	22.7634
LVAASQAALGL	P02768	1013.6	1	1		High	4.13945	507.303	2	24.3897	High	2.00778	1013.6	1	24.4898
QLQSLTCDLESLR	P14136	1562.79	1	1	C7(Carbamidomethyl)	High	4.05479	781.896	2	28.5115
NLQEAEEWYK	P08670	1309.61	1	1		High	4.01141	655.307	2	22.5773
CPEALFQPSFLGMESCGIHETTFNSIMK	P60709	3231.46	2	1	C1(Carbamidomethyl); C16(Carbamidomethyl)	High	4.00542	1077.83	3	32.6982	High	6.99438	1077.83	3	32.5852
KIESLEEEIR	P14136	1245.67	1	1		High	3.97625	623.338	2	20.5113	High	2.76577	623.338	2	20.5345
FADLTDAAAR	P14136	1050.52	1	1		High	3.95762	525.764	2	19.0166	High	3.85641	525.764	2	18.9965
LLVVYPWTQRFFESFGDLSTPDAVMGNPK	P68871	3314.66	1	1		High	3.90481	1105.56	3	38.377
LVNEVTEFAK	P02768	1149.62	1	1		High	3.89075	575.311	2	21.2428	High	3.92933	575.311	2	21.4875
LGDLYEEEMR	P08670	1254.57	1	1		High	3.87081	627.787	2	21.3405	High	3.54386	627.787	2	21.4365
TYFPHFDLSHGSAQVK	P69905	1833.89	1	1		High	3.86464	917.449	2	24.2255	High	4.17762	917.45	2	24.2265
AAFTECCQAADK	P02768	1371.57	1	1	C6(Carbamidomethyl); C7(Carbamidomethyl)	High	3.86363	686.287	2	14.6033	High	3.86504	686.287	2	14.6707
ETYGEMADCCAK	P02768	1434.53	1	1	C9(Carbamidomethyl); C10(Carbamidomethyl)	High	3.85932	717.77	2	16.132	High	3.89616	717.77	2	16.1682
VVLAYEPVWAIGTGK	P60174	1602.89	1	1		High	3.82259	801.949	2	29.6943	High	3.54917	801.948	2	29.7781
VGAGAPVYMAAVLEYLTAEILELAGNAAR	Q16777	2933.54	2	1		High	3.79445	978.52	3	46.6776
YICENQDSISSK	P02768	1443.64	1	1	C3(Carbamidomethyl)	High	3.77561	722.324	2	14.827	High	3.7503	722.324	2	14.9589
VPTANVSVVDLTCR	P04406	1530.79	1	1	C13(Carbamidomethyl)	High	3.77206	765.901	2	23.0895	High	4.30918	765.901	2	23.0824
QLQSLTCDLESLRGTNESLER	P14136	2449.2	1	1	C7(Carbamidomethyl)	High	3.75067	817.072	3	27.8747
QQVHVELDVAKPDLTAALK	P14136	2075.15	1	1		High	3.71574	519.543	4	24.7352
KLVAASQAALGL	P02768	1141.69	1	1		High	3.68785	571.35	2	23.389
CCTESLVNR	P02768	1138.5	1	1	C1(Carbamidomethyl); C2(Carbamidomethyl)	High	3.67172	569.752	2	15.0478	High	3.67523	569.753	2	14.9155
ALTVPELTQQMFDSK	Q13885	1707.86	2	1		High	3.65709	854.436	2	30.2903	High	4.42804	854.435	2	30.2307
FKDLGEENFK	P02768	1226.6	1	1		High	3.65096	409.54	3	19.1385	High	3.29883	613.806	2	19.0889
EAASYQEALAR	P14136	1208.59	1	1		High	3.5519	604.798	2	17.3808	High	3.31643	604.799	2	17.3612
DSGFQMNQLR	P02787	1195.55	1	1		High	3.47073	598.28	2	20.9912
SAVTALWGK	P68871	932.52	1	1		High	3.39111	466.764	2	23.8018	High	3.3949	466.763	2	23.8109
IHEEEVRELQEQLAR	P14136	1878.97	1	1		High	3.3679	626.993	3	22.4262
VPQVSTPTLVEVSR	P02768	1511.84	1	1		High	3.36354	756.425	2	22.5282
YISPDQLADLYK	P06733	1425.73	1	1		High	3.35408	713.367	2	26.7213
AEMMELNDR	P14136	1108.48	1	1		High	3.34442	554.742	2	18.8206
NQVSLTCLVK	P01857	1161.63	1	1	C7(Carbamidomethyl)	High	3.30135	581.318	2	23.1657
AGFAGDDAPR	P60709	976.448	2	1		High	3.29696	488.728	2	14.426	High	3.61207	488.728	2	14.3949
FQNALLVR	P02768	960.562	1	1		High	3.27308	480.785	2	21.8776	High	3.08063	480.785	2	21.879
AVFPSIVGRPR	P60709	1198.71	2	1		High	3.20336	599.856	2	22.227	High	3.46952	599.856	2	22.2267
MFLSFPTTK	P69905	1071.56	1	1		High	3.13168	536.282	2	27.073	High	3.09788	536.281	2	27.1975
KQTALVELVK	P02768	1128.7	1	1		High	3.09581	564.853	2	21.0413	High	2.89157	564.853	2	21.0095
IIPGFMCQGGDFTR	P62937	1598.74	1	1	C7(Carbamidomethyl)	High	2.93401	799.877	2	25.97	High	3.19877	799.876	2	26.0365
LLVVYPWTQR	P68871	1274.73	1	1		High	2.91367	637.867	2	40.6063	High	2.89495	637.866	2	41.23
EFTPPVQAAYQK	P68871	1378.7	1	1		High	2.78019	689.853	2	19.8197	High	2.93802	689.853	2	19.8549
LDELRDEGK	P02768	1074.54	1	1		High	2.74485	537.775	2	12.8991	High	2.81206	537.775	2	13.004
AEFAEVSK	P02768	880.441	1	1		High	2.71745	440.724	2	15.1445	High	2.64708	440.724	2	15.2344
AACLLPK	P02768	772.438	1	1	C3(Carbamidomethyl)	High	2.7104	386.723	2	17.7395	High	2.62902	386.723	2	17.8045
QDVDNASLAR	P08670	1088.53	1	1		High	2.70322	544.77	2	13.524
TPVSDRVTK	P02768	1002.56	1	1		High	2.68493	501.782	2	10.47
YLYEIAR	P02768	927.493	1	1		High	2.67333	464.25	2	20.6783	High	2.72396	464.25	2	20.8107
GPSVFPLAPSSK	P01857	1186.65	1	1		High	2.61982	593.827	2	23.29
AGLQFPVGR	Q16777	944.531	7	1		High	2.60481	472.769	2	22.6272	High	2.86654	472.769	2	22.576
EITALAPSTMK	P60709	1161.62	2	1		High	2.57951	581.313	2	20.1228	High	3.13911	581.313	2	19.8864
EYQDLLNVK	P08670	1121.58	1	1		High	2.57436	561.296	2	22.5027
MFLSFPTTK	P69905	1087.55	1	1	M1(Oxidation)	High	2.56421	544.278	2	25.0471
GTNESLER	P14136;P08670	905.432	2	2		High	2.55939	453.219	2	9.76215
FLEQQNK	P14136;P08670	906.467	2	2		High	2.49695	453.737	2	12.3396
QTALVELVK	P02768	1000.6	1	1		High	2.44127	500.805	2	23.1413
ALTVPELTQQMFDAK	P68371	1707.86	1	1	M11(Oxidation)	High	2.43646	854.436	2	30.2903	High	3.2211	854.435	2	30.2307
LVTDLTK	P02768	789.472	1	1		High	2.17357	789.471	1	16.3205	High	2.19684	789.472	1	16.3532
NAELLR	P14136	715.41	1	1		High	2.00754	715.41	1	15.3943
LCYVALDFEQEMATAASSSSLEK	P60709	2550.18	2	1	C2(Carbamidomethyl)						High	8.22929	1275.59	2	32.721
EAESCDCLQGFQLTHSLGGGTGSGMGTLLISK	P68371;P07437	3311.54	2	2	C5(Carbamidomethyl); C7(Carbamidomethyl)						High	7.4463	1104.52	3	29.2085
TIGGGDDSFNTFFSETGAGK	Q71U36	2007.89	1	1							High	6.25054	1004.45	2	28.0194
AMGIMNSFVNDIFER	O60814	1743.82	14	1							High	6.06692	872.414	2	35.4037
AYHEQLSVAEITNACFEPANQMVK	Q71U36	2750.29	1	1	C15(Carbamidomethyl)						High	5.98322	917.436	3	26.7834
VLGAFSDGLAHLDNLK	P68871	1669.89	1	1							High	5.93251	835.449	2	28.1377
TTGIVMDSGDGVTHTVPIYEGYALPHAILR	P60709	3183.62	2	1							High	5.86807	796.66	4	28.8215
HGEVCPAGWKPGSDTIKPDVQK	Q06830	2406.19	1	1	C5(Carbamidomethyl)						High	5.77742	602.302	4	18.7187
WGDAGAEYVVESTGVFTTMEK	P04406	2277.04	1	1							High	5.53838	1139.02	2	30.7692
LIGQIVSSITASLR	Q71U36	1457.87	1	1							High	4.8293	729.438	2	34.2919
IWHHTFYNELR	P60709	1515.75	2	1							High	4.61955	505.921	3	21.234
KASGPPVSELITK	P16403	1326.76	3	1							High	4.52273	663.885	2	20.1015
GHYTEGAELVDSVLDVVR	P68371;P07437	1958.98	2	2							High	4.49441	653.666	3	33.0849
AILVDLEPGTMDSVR	P07437	1615.84	1	1							High	4.4891	808.422	2	26.9002
TATESFASDPILYRPVAVALDTK	P14618	2465.29	1	1							High	4.42831	822.435	3	29.7526
LLSHCLLVTLAAHLPAEFTPAVHASLDKFLASVSTVLTSK	P69905	4258.33	1	1	C5(Carbamidomethyl)						High	4.41211	852.472	5	44.9805
GVVDSEDLPLNISR	P08238	1513.79	2	1							High	4.36616	757.397	2	24.5385
FRCPEALFQPSFLGMESCGIHETTFNSIMK	P60709	3534.64	2	1	C3(Carbamidomethyl); C18(Carbamidomethyl)						High	4.31049	884.414	4	32.3109
IIYGGSVTGATCK	P60174	1326.67	1	1	C12(Carbamidomethyl)						High	4.28719	663.84	2	17.4882
ALTVPELTQQMFDAK	P68371	1691.87	1	1							High	4.18212	846.438	2	30.6744
ISGLIYEETR	P62805	1180.62	1	1							High	4.04117	590.814	2	21.411
AVLVDLEPGTMDSVR	P68371	1601.82	1	1							High	3.94416	801.414	2	25.7907
ALTVPELTQQVFDAK	P07437	1659.9	1	1							High	3.92263	830.452	2	30.1827
LAMQEFMILPVGAANFR	P06733	1907.99	1	1							High	3.88085	954.498	2	34.3139
IMNTFSVVPSPK	P68371;P07437	1319.7	2	2							High	3.7303	660.355	2	23.6749
NDEELNKLLGK	Q16777	1272.68	7	1							High	3.66468	636.843	2	23.0074
ALAAAGYDVEK	P16403	1107.57	3	1							High	3.59286	554.287	2	17.338
HQGVMVGMGQK	P60709	1171.57	2	1							High	3.54235	586.289	2	15.4367
QVHPDTGISSK	O60814	1168.6	14	1							High	3.44859	390.203	3	11.4835
DSYVGDEAQSK	P60709	1198.52	2	1							High	3.40197	599.765	2	12.4484
LAVNMVPFPR	P68371;P07437	1143.63	2	2							High	3.37688	572.321	2	26.4295
EFNAETFTFHADICTLSEK	P02768	2260.02	1	1	C14(Carbamidomethyl)						High	3.35177	754.013	3	28.3182
ISVYYNEATGGK	P07437	1301.64	1	1							High	3.32586	651.322	2	18.5187
GYSFTTTAER	P60709	1132.53	2	1							High	3.26316	566.767	2	18.269
KATGPPVSELITK	P16401	1340.78	1	1							High	3.19997	670.893	2	20.4129
LDIDSPPITAR	P14618	1197.65	1	1							High	3.1454	599.328	2	21.1577
AGKPVICATQMLESMIK	P14618	1876.97	1	1	C7(Carbamidomethyl)						High	3.12035	626.328	3	32.045
ASGPPVSELITK	P16403	1198.67	3	1							High	3.08007	599.837	2	21.6357
ALAAGGYDVEK	P16401	1093.55	1	1							High	3.07113	547.28	2	16.856
TLTIVDTGIGMTK	P08238	1349.74	2	1							High	3.03064	675.372	2	24.6387
SGVSLAALKK	P16403	973.603	3	1							High	3.02506	487.305	2	18.6922
DSYVGDEAQSKR	P60709	1354.62	2	1							High	2.98673	677.816	2	12.3732
GNPTVEVDLFTSK	P06733	1406.72	1	1							High	2.89276	703.862	2	25.3242
HLQLAIR	Q16777	850.526	7	1							High	2.88337	425.767	2	18.9722
TIAQDYGVLK	Q06830	1107.61	1	1							High	2.84794	554.306	2	21.0327
DLTDYLMK	P60709	998.487	2	1							High	2.83597	499.747	2	25.5649
NDEELNK	Q16777	861.395	7	1							High	2.83302	431.201	2	6.67388
QITVNDLPVGR	Q06830	1211.67	1	1							High	2.74994	606.34	2	21.802
EGMNIVEAMER	P62937	1278.58	1	1							High	2.63485	639.795	2	25.9874
SLHTLFGDK	P02768	1017.54	1	1							High	2.55868	509.272	2	21.5364
TLYGFGG	P62805	714.345	1	1							High	2.35188	714.345	1	23.1819
