# Supplementary material for: Integrated proteomic platforms for the comparative characterization of medulloblastoma and pilocytic astrocytoma pediatric brain tumors: a preliminary study
Source: Royal Society of Chemistry journal article supplement (doi:10.1039/c5mb00076a), 2015-04-24
Supplement: c5mb00076a4.xlsx [file c5mb00076a4.xlsx]

## Sheet: Thymosin beta4
P62328 Thymosin β4
Num Matched: 124/143 (13.3% unmatched) Matched Intensity: 86.7% Matched Series Intensity: 86.7%
MS2 of m/z 993.10 (charge +5)
	MH+1(av)	MH+1(mono)
	4964.55	4961.49
	Main Sequence Ions
	b				y
			Acetyl
	130.05	1	S	43	4919.48
	245.077	2	D	42	4832.45
	373.172	3	K	41	4717.42
	470.224	4	P	40	4589.33
	585.251	5	D	39	4492.28
	716.292	6	M	38	4377.25
	787.329	7	A	37	4246.21
	916.372	8	E	36	4175.17
	1029.46	9	I	35	4046.13
	1158.5	10	E	34	3933.05
	1286.59	11	K	33	3804
	1433.66	12	F	32	3675.91
	1548.69	13	D	31	3528.84
	1676.78	14	K	30	3413.81
	1763.82	15	S	29	3285.72
	1891.91	16	K	28	3198.69
	2004.99	17	L	27	3070.59
	2133.09	18	K	26	2957.51
	2261.18	19	K	25	2829.41
	2362.23	20	T	24	2701.32
	2491.27	21	E	23	2600.27
	2592.32	22	T	22	2471.23
	2720.38	23	Q	21	2370.18
	2849.42	24	E	20	2242.12
	2977.52	25	K	19	2113.08
	3091.56	26	N	18	1984.98
	3188.61	27	P	17	1870.94
	3301.7	28	L	16	1773.89
	3398.75	29	P	15	1660.8
	3485.78	30	S	14	1563.75
	3613.88	31	K	13	1476.72
	3742.92	32	E	12	1348.62
	3843.97	33	T	11	1219.58
	3957.05	34	I	10	1118.53
	4086.1	35	E	9	1005.45
	4214.15	36	Q	8	876.406
	4343.2	37	E	7	748.347
	4471.29	38	K	6	619.305
	4599.35	39	Q	5	491.21
	4670.39	40	A	4	363.151
	4727.41	41	G	3	292.114
	4856.45	42	E	2	235.093
	---	43	S	1	106.05

## Sheet: Thymosin beta 4 fragments
P62328 Thymosin β4 frag.1-41						P62328 Thymosin β4 frag.1-39						P62328 Thymosin β4 frag.1-15						P62328 Thymosin β4 frag.1-14						P62328 Thymosin β4 frag.1-13						P62328 Thymosin β4 frag.1-11
Num Matched: 13/13 (0.0% unmatched) Matched Intensity: 100.0% Matched Series Intensity: 100.0%						Num Matched: 19/20 (5.0% unmatched) Matched Intensity: 95.0% Matched Series Intensity: 95.0%						Num Matched: 29/32 (9.4% unmatched) Matched Intensity: 90.6% Matched Series Intensity: 90.6%						Num Matched: 29/32 (9.4% unmatched) Matched Intensity: 90.6% Matched Series Intensity: 90.6%						Num Matched: 26/29 (10.3% unmatched) Matched Intensity: 89.7% Matched Series Intensity: 89.7%						Num Matched: 5/6 (16.7% unmatched) Matched Intensity: 83.3% Matched Series Intensity: 80.0%
MS2 of m/z 790.24 (charge +6)	MH+1(av)	MH+1(mono)				MS2 of m/z 770.73 (charge +6)	MH+1(av)	MH+1(mono)				MS2 of m/z 594.61 (charge +3)	MH+1(av)	MH+1(mono)				MS2 of m/z 565.6 (charge +3)	MH+1(av)	MH+1(mono)				MS2 of m/z 783.85 (charge +2)	MH+1(av)	MH+1(mono)				MS2 of m/z 652.8 (charge +2)	MH+1(av)	MH+1(mono)
	4748.35	4745.42					4620.22	4617.36					1782.98	1781.83					1695.9	1694.79					1567.72	1566.7					1305.46	1304.6
	Main Sequence Ions						Main Sequence Ions						Main Sequence Ions						Main Sequence Ions						Main Sequence Ions						Main Sequence Ions
	b				y		b				y		b				y		b				y		b				y		b				y
			Acetyl						Acetyl						Acetyl						Acetyl						Acetyl						Acetyl
	130.05	1	S	41	4703.41		130.05	1	S	39	4575.35		130.05	1	S	15	1739.82		130.05	1	S	14	1652.78		130.05	1	S	13	1524.69		130.05	1	S	11	1262.59
	245.077	2	D	40	4616.38		245.077	2	D	38	4488.32		245.077	2	D	14	1652.78		245.077	2	D	13	1565.75		245.077	2	D	12	1437.66		245.077	2	D	10	1175.56
	373.172	3	K	39	4501.35		373.172	3	K	37	4373.29		373.172	3	K	13	1537.76		373.172	3	K	12	1450.72		373.172	3	K	11	1322.63		373.172	3	K	9	1060.53
	470.224	4	P	38	4373.25		470.224	4	P	36	4245.2		470.224	4	P	12	1409.66		470.224	4	P	11	1322.63		470.224	4	P	10	1194.53		470.224	4	P	8	932.439
	585.251	5	D	37	4276.2		585.251	5	D	35	4148.14		585.251	5	D	11	1312.61		585.251	5	D	10	1225.58		585.251	5	D	9	1097.48		585.251	5	D	7	835.387
	716.292	6	M	36	4161.17		716.292	6	M	34	4033.12		716.292	6	M	10	1197.58		716.292	6	M	9	1110.55		716.292	6	M	8	982.455		716.292	6	M	6	720.36
	787.329	7	A	35	4030.13		787.329	7	A	33	3902.08		787.329	7	A	9	1066.54		787.329	7	A	8	979.51		787.329	7	A	7	851.414		787.329	7	A	5	589.319
	916.372	8	E	34	3959.1		916.372	8	E	32	3831.04		916.372	8	E	8	995.504		916.372	8	E	7	908.472		916.372	8	E	6	780.377		916.372	8	E	4	518.282
	1029.46	9	I	33	3830.05		1029.46	9	I	31	3702		1029.46	9	I	7	866.462		1029.46	9	I	6	779.43		1029.46	9	I	5	651.335		1029.46	9	I	3	389.24
	1158.5	10	E	32	3716.97		1158.5	10	E	30	3588.91		1158.5	10	E	6	753.378		1158.5	10	E	5	666.346		1158.5	10	E	4	538.251		1158.5	10	E	2	276.155
	1286.59	11	K	31	3587.93		1286.59	11	K	29	3459.87		1286.59	11	K	5	624.335		1286.59	11	K	4	537.303		1286.59	11	K	3	409.208		---	11	K	1	147.113
	1433.66	12	F	30	3459.83		1433.66	12	F	28	3331.77		1433.66	12	F	4	496.24		1433.66	12	F	3	409.208		1433.66	12	F	2	281.113
	1548.69	13	D	29	3312.76		1548.69	13	D	27	3184.71		1548.69	13	D	3	349.172		1548.69	13	D	2	262.14		---	13	D	1	134.045
	1676.78	14	K	28	3197.74		1676.78	14	K	26	3069.68		1676.78	14	K	2	234.145		---	14	K	1	147.113
	1763.82	15	S	27	3069.64		1763.82	15	S	25	2941.58		---	15	S	1	106.05
	1891.91	16	K	26	2982.61		1891.91	16	K	24	2854.55
	2004.99	17	L	25	2854.52		2004.99	17	L	23	2726.46
	2133.09	18	K	24	2741.43		2133.09	18	K	22	2613.37
	2261.18	19	K	23	2613.34		2261.18	19	K	21	2485.28
	2362.23	20	T	22	2485.24		2362.23	20	T	20	2357.18
	2491.27	21	E	21	2384.19		2491.27	21	E	19	2256.14
	2592.32	22	T	20	2255.15		2592.32	22	T	18	2127.09
	2720.38	23	Q	19	2154.1		2720.38	23	Q	17	2026.05
	2849.42	24	E	18	2026.05		2849.42	24	E	16	1897.99
	2977.52	25	K	17	1897		2977.52	25	K	15	1768.94
	3091.56	26	N	16	1768.91		3091.56	26	N	14	1640.85
	3188.61	27	P	15	1654.86		3188.61	27	P	13	1526.81
	3301.7	28	L	14	1557.81		3301.7	28	L	12	1429.75
	3398.75	29	P	13	1444.73		3398.75	29	P	11	1316.67
	3485.78	30	S	12	1347.67		3485.78	30	S	10	1219.62
	3613.88	31	K	11	1260.64		3613.88	31	K	9	1132.58
	3742.92	32	E	10	1132.55		3742.92	32	E	8	1004.49
	3843.97	33	T	9	1003.51		3843.97	33	T	7	875.447
	3957.05	34	I	8	902.458		3957.05	34	I	6	774.399
	4086.1	35	E	7	789.374		4086.1	35	E	5	661.315
	4214.15	36	Q	6	660.331		4214.15	36	Q	4	532.273
	4343.2	37	E	5	532.273		4343.2	37	E	3	404.214
	4471.29	38	K	4	403.23		4471.29	38	K	2	275.171
	4599.35	39	Q	3	275.135		---	39	Q	1	147.076
	4670.39	40	A	2	147.076
	---	41	G	1	76.0393

## Sheet: Thymosin beta 10
P63313 Thymosin β10
Num Matched: 70/72 (2.8% unmatched) Matched Intensity: 97.2% Matched Series Intensity: 97.2%
MS2 of m/z 823.26 (charge +6)	MH+1(av)	MH+1(mono)
	4937.57	4934.53
	Main Sequence Ions
	b				y
			Acetyl
	114.055	1	A	43	4892.52
	229.082	2	D	42	4821.48
	357.177	3	K	41	4706.46
	454.23	4	P	40	4578.36
	569.257	5	D	39	4481.31
	700.297	6	M	38	4366.28
	757.318	7	G	37	4235.24
	886.361	8	E	36	4178.22
	999.445	9	I	35	4049.18
	1070.48	10	A	34	3936.09
	1157.51	11	S	33	3865.06
	1304.58	12	F	32	3778.02
	1419.61	13	D	31	3630.95
	1547.7	14	K	30	3515.93
	1618.74	15	A	29	3387.83
	1746.84	16	K	28	3316.8
	1859.92	17	L	27	3188.7
	1988.02	18	K	26	3075.62
	2116.11	19	K	25	2947.52
	2217.16	20	T	24	2819.43
	2346.2	21	E	23	2718.38
	2447.25	22	T	22	2589.34
	2575.31	23	Q	21	2488.29
	2704.35	24	E	20	2360.23
	2832.44	25	K	19	2231.19
	2946.49	26	N	18	2103.09
	3047.54	27	T	17	1989.05
	3160.62	28	L	16	1888
	3257.67	29	P	15	1774.92
	3358.72	30	T	14	1677.87
	3486.81	31	K	13	1576.82
	3615.86	32	E	12	1448.72
	3716.91	33	T	11	1319.68
	3829.99	34	I	10	1218.63
	3959.03	35	E	9	1105.55
	4087.09	36	Q	8	976.506
	4216.13	37	E	7	848.447
	4344.23	38	K	6	719.405
	4500.33	39	R	5	591.31
	4587.36	40	S	4	435.209
	4716.4	41	E	3	348.176
	4829.49	42	I	2	219.134
	---	43	S	1	106.05

## Sheet: Thymosin beta 10 fragments
P63313 Thymosin β10 frag. 1-40						P63313 Thymosin β10 frag. 1-38						P63313 Thymosin β10 frag. 1-26						P63313 Thymosin β10 frag. 10-26						P63313 Thymosin β10 frag. 28-41
Num Matched: 93/107 (13.1% unmatched) Matched Intensity: 86.9% Matched Series Intensity: 86.9%						Num Matched: 16/17 (5.9% unmatched) Matched Intensity: 94.1% Matched Series Intensity: 94.1%						Num Matched: 46/59 (22.0% unmatched) Matched Intensity: 78.0% Matched Series Intensity: 78.0%						Num Matched: 23/27 (14.8% unmatched) Matched Intensity: 85.2% Matched Series Intensity: 85.2%						Num Matched: 12/15 (20.0% unmatched) Matched Intensity: 80.0% Matched Series Intensity: 80.0%
MS2 of m/z 789.91 (charge +6)	MH+1(av)	MH+1(mono)				MS2 of m/z 727.88 (charge +6)	MH+1(av)	MH+1(mono)				MS2 of m/z 741.88 (charge +4)	MH+1(av)	MH+1(mono)				MS2 of m/z 656.03 (charge +3)	MH+1(av)	MH+1(mono)				MS2 of m/z 563.30 (charge +3)	MH+1(av)	MH+1(mono)
	4737.33	4734.41					4364.94	4362.24					2966.36	2964.5					1967.24	1966.06					1688.89	1687.89
	Main Sequence Ions						Main Sequence Ions						Main Sequence Ions						Main Sequence Ions						Main Sequence Ions
	b				y		b				y		b				y		b				y		b				y
			Acetyl						Acetyl						Acetyl
	114.055	1	A	41	4692.4		114.055	1	A	38	4320.23		114.055	1	A	26	2922.49		---	1	A	17	---		---	1	L	14	---
	229.082	2	D	40	4621.37		229.082	2	D	37	4249.19		229.082	2	D	25	2851.45		159.076	2	S	16	1895.02		211.144	2	P	13	1574.8
	357.177	3	K	39	4506.34		357.177	3	K	36	4134.16		357.177	3	K	24	2736.42		306.145	3	F	15	1807.99		312.192	3	T	12	1477.75
	454.23	4	P	38	4378.24		454.23	4	P	35	4006.07		454.23	4	P	23	2608.33		421.172	4	D	14	1660.92		440.287	4	K	11	1376.7
	569.257	5	D	37	4281.19		569.257	5	D	34	3909.02		569.257	5	D	22	2511.28		549.267	5	K	13	1545.9		569.329	5	E	10	1248.61
	700.297	6	M	36	4166.16		700.297	6	M	33	3793.99		700.297	6	M	21	2396.25		620.304	6	A	12	1417.8		670.377	6	T	9	1119.56
	757.318	7	G	35	4035.12		757.318	7	G	32	3662.95		757.318	7	G	20	2265.21		748.399	7	K	11	1346.76		783.461	7	I	8	1018.52
	886.361	8	E	34	3978.1		886.361	8	E	31	3605.93		886.361	8	E	19	2208.19		861.483	8	L	10	1218.67		912.504	8	E	7	905.432
	999.445	9	I	33	3849.06		999.445	9	I	30	3476.88		999.445	9	I	18	2079.14		989.578	9	K	9	1105.58		1040.56	9	Q	6	776.39
	1070.48	10	A	32	3735.98		1070.48	10	A	29	3363.8		1070.48	10	A	17	1966.06		1117.67	10	K	8	977.49		1169.6	10	E	5	648.331
	1157.51	11	S	31	3664.94		1157.51	11	S	28	3292.76		1157.51	11	S	16	1895.02		1218.72	11	T	7	849.395		1297.7	11	K	4	519.288
	1304.58	12	F	30	3577.91		1304.58	12	F	27	3205.73		1304.58	12	F	15	1807.99		1347.76	12	E	6	748.347		1453.8	12	R	3	391.194
	1419.61	13	D	29	3430.84		1419.61	13	D	26	3058.66		1419.61	13	D	14	1660.92		1448.81	13	T	5	619.305		1540.83	13	S	2	235.093
	1547.7	14	K	28	3315.81		1547.7	14	K	25	2943.64		1547.7	14	K	13	1545.9		1576.87	14	Q	4	518.257		---	14	E	1	148.06
	1618.74	15	A	27	3187.72		1618.74	15	A	24	2815.54		1618.74	15	A	12	1417.8		1705.91	15	E	3	390.198
	1746.84	16	K	26	3116.68		1746.84	16	K	23	2744.5		1746.84	16	K	11	1346.76		1834.01	16	K	2	261.156
	1859.92	17	L	25	2988.58		1859.92	17	L	22	2616.41		1859.92	17	L	10	1218.67		---	17	N	1	133.061
	1988.02	18	K	24	2875.5		1988.02	18	K	21	2503.32		1988.02	18	K	9	1105.58
	2116.11	19	K	23	2747.41		2116.11	19	K	20	2375.23		2116.11	19	K	8	977.49
	2217.16	20	T	22	2619.31		2217.16	20	T	19	2247.14		2217.16	20	T	7	849.395
	2346.2	21	E	21	2518.26		2346.2	21	E	18	2146.09		2346.2	21	E	6	748.347
	2447.25	22	T	20	2389.22		2447.25	22	T	17	2017.04		2447.25	22	T	5	619.305
	2575.31	23	Q	19	2288.17		2575.31	23	Q	16	1916		2575.31	23	Q	4	518.257
	2704.35	24	E	18	2160.11		2704.35	24	E	15	1787.94		2704.35	24	E	3	390.198
	2832.44	25	K	17	2031.07		2832.44	25	K	14	1658.9		2832.44	25	K	2	261.156
	2946.49	26	N	16	1902.98		2946.49	26	N	13	1530.8		---	26	N	1	133.061
	3047.54	27	T	15	1788.93		3047.54	27	T	12	1416.76
	3160.62	28	L	14	1687.89		3160.62	28	L	11	1315.71
	3257.67	29	P	13	1574.8		3257.67	29	P	10	1202.63
	3358.72	30	T	12	1477.75		3358.72	30	T	9	1105.57
	3486.81	31	K	11	1376.7		3486.81	31	K	8	1004.53
	3615.86	32	E	10	1248.61		3615.86	32	E	7	876.431
	3716.91	33	T	9	1119.56		3716.91	33	T	6	747.388
	3829.99	34	I	8	1018.52		3829.99	34	I	5	646.341
	3959.03	35	E	7	905.432		3959.03	35	E	4	533.257
	4087.09	36	Q	6	776.39		4087.09	36	Q	3	404.214
	4216.13	37	E	5	648.331		4216.13	37	E	2	276.155
	4344.23	38	K	4	519.288		---	38	K	1	147.113
	4500.33	39	R	3	391.194
	4587.36	40	S	2	235.093
	---	41	E	1	148.06

## Sheet: Prothymosin alpha
P06454 Prothymosin α 1 isoform 2
Num Matched: 92/94 (2.1% unmatched) Matched Intensity: 97.9% Matched Series Intensity: 97.9%
MS2 of m/z 922.77 (charge +13)	MH+1(av)	MH+1(mono)
	11985.8	11978.9
	Main Sequence Ions
	b				y
			Acetyl
	130.05	1	S	109	11936.9
	245.077	2	D	108	11849.9
	316.114	3	A	107	11734.8
	387.151	4	A	106	11663.8
	486.219	5	V	105	11592.8
	601.246	6	D	104	11493.7
	702.294	7	T	103	11378.7
	789.326	8	S	102	11277.6
	876.358	9	S	101	11190.6
	1005.4	10	E	100	11103.6
	1118.48	11	I	99	10974.5
	1219.53	12	T	98	10861.4
	1320.58	13	T	97	10760.4
	1448.68	14	K	96	10659.3
	1563.7	15	D	95	10531.2
	1676.79	16	L	94	10416.2
	1804.88	17	K	93	10303.1
	1933.92	18	E	92	10175
	2062.02	19	K	91	10046
	2190.11	20	K	90	9917.89
	2319.16	21	E	89	9789.8
	2418.22	22	V	88	9660.75
	2517.29	23	V	87	9561.69
	2646.34	24	E	86	9462.62
	2775.38	25	E	85	9333.58
	2846.42	26	A	84	9204.53
	2975.46	27	E	83	9133.5
	3089.5	28	N	82	9004.45
	3146.52	29	G	81	8890.41
	3302.62	30	R	80	8833.39
	3417.65	31	D	79	8677.29
	3488.69	32	A	78	8562.26
	3585.74	33	P	77	8491.22
	3656.78	34	A	76	8394.17
	3770.82	35	N	75	8323.13
	3827.84	36	G	74	8209.09
	3941.88	37	N	73	8152.07
	4012.92	38	A	72	8038.03
	4126.96	39	N	71	7966.99
	4256.01	40	E	70	7852.95
	4385.05	41	E	69	7723.9
	4499.09	42	N	68	7594.86
	4556.11	43	G	67	7480.82
	4685.16	44	E	66	7423.8
	4813.22	45	Q	65	7294.75
	4942.26	46	E	64	7166.7
	5013.3	47	A	63	7037.65
	5128.32	48	D	62	6966.62
	5242.36	49	N	61	6851.59
	5371.41	50	E	60	6737.55
	5470.48	51	V	59	6608.5
	5585.5	52	D	58	6509.43
	5714.55	53	E	57	6394.41
	5843.59	54	E	56	6265.37
	5972.63	55	E	55	6136.32
	6101.67	56	E	54	6007.28
	6230.72	57	E	53	5878.24
	6287.74	58	G	52	5749.19
	6344.76	59	G	51	5692.17
	6473.8	60	E	50	5635.15
	6602.84	61	E	49	5506.11
	6731.89	62	E	48	5377.07
	6860.93	63	E	47	5248.02
	6989.97	64	E	46	5118.98
	7119.01	65	E	45	4989.94
	7248.06	66	E	44	4860.9
	7377.1	67	E	43	4731.85
	7434.12	68	G	42	4602.81
	7549.15	69	D	41	4545.79
	7606.17	70	G	40	4430.76
	7735.21	71	E	39	4373.74
	7864.25	72	E	38	4244.7
	7993.3	73	E	37	4115.66
	8108.32	74	D	36	3986.61
	8165.35	75	G	35	3871.59
	8280.37	76	D	34	3814.57
	8409.42	77	E	33	3699.54
	8524.44	78	D	32	3570.5
	8653.48	79	E	31	3455.47
	8782.53	80	E	30	3326.43
	8853.56	81	A	29	3197.38
	8982.61	82	E	28	3126.35
	9069.64	83	S	27	2997.3
	9140.68	84	A	26	2910.27
	9241.72	85	T	25	2839.23
	9298.75	86	G	24	2738.19
	9426.84	87	K	23	2681.17
	9582.94	88	R	22	2553.07
	9653.98	89	A	21	2396.97
	9725.02	90	A	20	2325.93
	9854.06	91	E	19	2254.9
	9969.09	92	D	18	2125.85
	10084.1	93	D	17	2010.83
	10213.2	94	E	16	1895.8
	10328.2	95	D	15	1766.76
	10443.2	96	D	14	1651.73
	10558.2	97	D	13	1536.7
	10657.3	98	V	12	1421.68
	10772.3	99	D	11	1322.61
	10873.4	100	T	10	1207.58
	11001.5	101	K	9	1106.53
	11129.6	102	K	8	978.437
	11257.6	103	Q	7	850.342
	11385.7	104	K	6	722.284
	11486.8	105	T	5	594.189
	11601.8	106	D	4	493.141
	11730.8	107	E	3	378.114
	11845.9	108	D	2	249.072
	---	109	D	1	134.044

## Sheet: Thymosin alpha 1 
P06454 Thymosin α 1
Num Matched: 20/21 (4.8% unmatched) Matched Intensity: 95.2% Matched Series Intensity: 95.2%
MS2 of m/z 777.63 (charge +4)	MH+1(av)	MH+1(mono)
	3109.34	3107.51
	Main Sequence Ions
	b				y
			Acetyl
	130.05	1	S	28	3065.5
	245.077	2	D	27	2978.47
	316.114	3	A	26	2863.44
	387.151	4	A	25	2792.4
	486.219	5	V	24	2721.37
	601.246	6	D	23	2622.3
	702.294	7	T	22	2507.27
	789.326	8	S	21	2406.22
	876.358	9	S	20	2319.19
	1005.4	10	E	19	2232.16
	1118.48	11	I	18	2103.12
	1219.53	12	T	17	1990.03
	1320.58	13	T	16	1888.99
	1448.68	14	K	15	1787.94
	1563.7	15	D	14	1659.84
	1676.79	16	L	13	1544.82
	1804.88	17	K	12	1431.73
	1933.92	18	E	11	1303.64
	2062.02	19	K	10	1174.6
	2190.11	20	K	9	1046.5
	2319.16	21	E	8	918.405
	2418.22	22	V	7	789.362
	2517.29	23	V	6	690.294
	2646.34	24	E	5	591.226
	2775.38	25	E	4	462.183
	2846.42	26	A	3	333.14
	2975.46	27	E	2	262.103
	---	28	N	1	133.061

## Sheet: Thymosin alpha 11
P06454 Thymosin α 11
Num Matched: 40/44 (9.1% unmatched) Matched Intensity: 90.9% Matched Series Intensity: 90.9%
MS2 of m/z 947.96 (charge +4)	MH+1(av)	MH+1(mono)
	3791.05	3788.83
	Main Sequence Ions
	b				y
			Acetyl
	130.05	1	S	35	3746.82
	245.077	2	D	34	3659.79
	316.114	3	A	33	3544.76
	387.151	4	A	32	3473.72
	486.219	5	V	31	3402.69
	601.246	6	D	30	3303.62
	702.294	7	T	29	3188.59
	789.326	8	S	28	3087.54
	876.358	9	S	27	3000.51
	1005.4	10	E	26	2913.48
	1118.48	11	I	25	2784.44
	1219.53	12	T	24	2671.35
	1320.58	13	T	23	2570.31
	1448.68	14	K	22	2469.26
	1563.7	15	D	21	2341.16
	1676.79	16	L	20	2226.14
	1804.88	17	K	19	2113.05
	1933.92	18	E	18	1984.96
	2062.02	19	K	17	1855.91
	2190.11	20	K	16	1727.82
	2319.16	21	E	15	1599.72
	2418.22	22	V	14	1470.68
	2517.29	23	V	13	1371.61
	2646.34	24	E	12	1272.55
	2775.38	25	E	11	1143.5
	2846.42	26	A	10	1014.46
	2975.46	27	E	9	943.423
	3089.5	28	N	8	814.38
	3146.52	29	G	7	700.337
	3302.62	30	R	6	643.316
	3417.65	31	D	5	487.215
	3488.69	32	A	4	372.188
	3585.74	33	P	3	301.151
	3656.78	34	A	2	204.098
	---	35	N	1	133.061

## Sheet: Prothymosin alpha frag. 1-17
P06454 Prothymosin α 1 fragm. 1-17
Num Matched: 9/9 (0.0% unmatched) Matched Intensity: 100.0% Matched Series Intensity: 100.0%
MS2 of m/z 911.95 (charge +2)	MH+1(av)	MH+1(mono)
	1823.96	1822.89
	Main Sequence Ions
	b				y
			Acetyl
	130.05	1	S	17	1780.88
	245.077	2	D	16	1693.85
	316.114	3	A	15	1578.82
	387.151	4	A	14	1507.79
	486.219	5	V	13	1436.75
	601.246	6	D	12	1337.68
	702.294	7	T	11	1222.65
	789.326	8	S	10	1121.6
	876.358	9	S	9	1034.57
	1005.4	10	E	8	947.541
	1118.48	11	I	7	818.498
	1219.53	12	T	6	705.414
	1320.58	13	T	5	604.366
	1448.68	14	K	4	503.319
	1563.7	15	D	3	375.224
	1676.79	16	L	2	260.197
	---	17	K	1	147.113

## Sheet: Parathymosin
P20962 Parathymosin
Num Matched: 27/27 (0.0% unmatched) Matched Intensity: 100.0% Matched Series Intensity: 100.0%
MS2 of m/z 1431.28 (charge +8)	MH+1(av)	MH+1(mono)
	11441.8	11435.2
	Main Sequence Ions
	b				y
			Acetyl
	130.05	1	S	101	11393.2
	259.092	2	E	100	11306.1
	387.187	3	K	99	11177.1
	474.219	4	S	98	11049
	573.288	5	V	97	10962
	702.331	6	E	96	10862.9
	773.368	7	A	95	10733.8
	844.405	8	A	94	10662.8
	915.442	9	A	93	10591.8
	1044.48	10	E	92	10520.7
	1157.57	11	L	91	10391.7
	1244.6	12	S	90	10278.6
	1315.64	13	A	89	10191.6
	1443.73	14	K	88	10120.5
	1558.76	15	D	87	9992.44
	1671.84	16	L	86	9877.41
	1799.94	17	K	85	9764.33
	1928.98	18	E	84	9636.23
	2057.08	19	K	83	9507.19
	2185.17	20	K	82	9379.1
	2314.21	21	E	81	9251
	2442.31	22	K	80	9121.96
	2541.38	23	V	79	8993.86
	2670.42	24	E	78	8894.8
	2799.46	25	E	77	8765.75
	2927.56	26	K	76	8636.71
	2998.59	27	A	75	8508.62
	3085.63	28	S	74	8437.58
	3241.73	29	R	73	8350.55
	3369.82	30	K	72	8194.44
	3498.86	31	E	71	8066.35
	3654.97	32	R	70	7937.31
	3783.06	33	K	69	7781.21
	3911.16	34	K	68	7653.11
	4040.2	35	E	67	7525.02
	4139.27	36	V	66	7395.97
	4238.34	37	V	65	7296.91
	4367.38	38	E	64	7197.84
	4496.42	39	E	63	7068.79
	4625.46	40	E	62	6939.75
	4754.51	41	E	61	6810.71
	4868.55	42	N	60	6681.67
	4925.57	43	G	59	6567.62
	4996.61	44	A	58	6510.6
	5125.65	45	E	57	6439.57
	5254.69	46	E	56	6310.52
	5383.74	47	E	55	6181.48
	5512.78	48	E	54	6052.44
	5641.82	49	E	53	5923.39
	5770.86	50	E	52	5794.35
	5871.91	51	T	51	5665.31
	5942.95	52	A	50	5564.26
	6071.99	53	E	49	5493.22
	6187.02	54	D	48	5364.18
	6244.04	55	G	47	5249.16
	6373.08	56	E	46	5192.13
	6502.12	57	E	45	5063.09
	6631.17	58	E	44	4934.05
	6746.19	59	D	43	4805.01
	6875.24	60	E	42	4689.98
	6932.26	61	G	41	4560.94
	7061.3	62	E	40	4503.91
	7190.34	63	E	39	4374.87
	7319.39	64	E	38	4245.83
	7434.41	65	D	37	4116.79
	7563.45	66	E	36	4001.76
	7692.5	67	E	35	3872.72
	7821.54	68	E	34	3743.68
	7950.58	69	E	33	3614.63
	8079.63	70	E	32	3485.59
	8208.67	71	E	31	3356.55
	8323.69	72	D	30	3227.5
	8438.72	73	D	29	3112.48
	8567.76	74	E	28	2997.45
	8624.79	75	G	27	2868.41
	8721.84	76	P	26	2811.39
	8792.88	77	A	25	2714.33
	8905.96	78	L	24	2643.3
	9034.05	79	K	23	2530.21
	9190.16	80	R	22	2402.12
	9261.19	81	A	21	2246.02
	9332.23	82	A	20	2174.98
	9461.27	83	E	19	2103.94
	9590.32	84	E	18	1974.9
	9719.36	85	E	17	1845.86
	9834.38	86	D	16	1716.81
	9963.43	87	E	15	1601.79
	10034.5	88	A	14	1472.75
	10149.5	89	D	13	1401.71
	10246.5	90	P	12	1286.68
	10374.6	91	K	11	1189.63
	10530.7	92	R	10	1061.53
	10658.8	93	Q	9	905.432
	10786.9	94	K	8	777.374
	10887.9	95	T	7	649.279
	11017	96	E	6	548.231
	11131	97	N	5	419.188
	11188	98	G	4	305.146
	11259.1	99	A	3	248.124
	11346.1	100	S	2	177.087
	---	101	A	1	90.055

## Sheet: Ubiquitin and fragments
P0CG47 Ubiquitin						P0CG47 Ubiquitin fragment 1-74						P0CG47 Ubiquitin fragment 1-73
Num Matched: 58/63 (7.9% unmatched) Matched Intensity: 92.1% Matched Series Intensity: 92.1%						Num Matched: 84/89 (5.6% unmatched) Matched Intensity: 94.4% Matched Series Intensity: 94.4%						Num Matched: 37/40 (7.5% unmatched) Matched Intensity: 92.5% Matched Series Intensity: 92.5%
MS2 of m/z 1071.59 (charge +8)	MH+1(av)	MH+1(mono)				MS2 of m/z 1056.70 (charge +8)	MH+1(av)	MH+1(mono)				MS2 of m/z 1185.22 (charge +7)	MH+1(av)	MH+1(mono)
	8565.92	8560.62					8451.81	8446.58					8295.63	8290.48
	Main Sequence Ions						Main Sequence Ions						Main Sequence Ions
	b				y		b				y		b				y
	---	1	M	76	---		---	1	M	74	---		---	1	M	73	---
	260.106	2	Q	75	8429.58		260.106	2	Q	73	8315.54		260.106	2	Q	72	8159.44
	373.19	3	I	74	8301.52		373.19	3	I	72	8187.48		373.19	3	I	71	8031.38
	520.259	4	F	73	8188.44		520.259	4	F	71	8074.4		520.259	4	F	70	7918.3
	619.327	5	V	72	8041.37		619.327	5	V	70	7927.33		619.327	5	V	69	7771.23
	747.422	6	K	71	7942.3		747.422	6	K	69	7828.26		747.422	6	K	68	7672.16
	848.47	7	T	70	7814.21		848.47	7	T	68	7700.17		848.47	7	T	67	7544.06
	961.554	8	L	69	7713.16		961.554	8	L	67	7599.12		961.554	8	L	66	7443.02
	1062.6	9	T	68	7600.08		1062.6	9	T	66	7486.03		1062.6	9	T	65	7329.93
	1119.62	10	G	67	7499.03		1119.62	10	G	65	7384.99		1119.62	10	G	64	7228.89
	1247.72	11	K	66	7442.01		1247.72	11	K	64	7327.97		1247.72	11	K	63	7171.86
	1348.77	12	T	65	7313.91		1348.77	12	T	63	7199.87		1348.77	12	T	62	7043.77
	1461.85	13	I	64	7212.87		1461.85	13	I	62	7098.82		1461.85	13	I	61	6942.72
	1562.9	14	T	63	7099.78		1562.9	14	T	61	6985.74		1562.9	14	T	60	6829.64
	1675.98	15	L	62	6998.73		1675.98	15	L	60	6884.69		1675.98	15	L	59	6728.59
	1805.02	16	E	61	6885.65		1805.02	16	E	59	6771.61		1805.02	16	E	58	6615.51
	1904.09	17	V	60	6756.61		1904.09	17	V	58	6642.56		1904.09	17	V	57	6486.46
	2033.14	18	E	59	6657.54		2033.14	18	E	57	6543.5		2033.14	18	E	56	6387.39
	2130.19	19	P	58	6528.5		2130.19	19	P	56	6414.45		2130.19	19	P	55	6258.35
	2217.22	20	S	57	6431.44		2217.22	20	S	55	6317.4		2217.22	20	S	54	6161.3
	2332.25	21	D	56	6344.41		2332.25	21	D	54	6230.37		2332.25	21	D	53	6074.27
	2433.29	22	T	55	6229.38		2433.29	22	T	53	6115.34		2433.29	22	T	52	5959.24
	2546.38	23	I	54	6128.34		2546.38	23	I	52	6014.29		2546.38	23	I	51	5858.19
	2675.42	24	E	53	6015.25		2675.42	24	E	51	5901.21		2675.42	24	E	50	5745.11
	2789.46	25	N	52	5886.21		2789.46	25	N	50	5772.17		2789.46	25	N	49	5616.07
	2888.53	26	V	51	5772.17		2888.53	26	V	49	5658.12		2888.53	26	V	48	5502.02
	3016.63	27	K	50	5673.1		3016.63	27	K	48	5559.06		3016.63	27	K	47	5402.95
	3087.66	28	A	49	5545		3087.66	28	A	47	5430.96		3087.66	28	A	46	5274.86
	3215.76	29	K	48	5473.97		3215.76	29	K	46	5359.92		3215.76	29	K	45	5203.82
	3328.84	30	I	47	5345.87		3328.84	30	I	45	5231.83		3328.84	30	I	44	5075.73
	3456.9	31	Q	46	5232.79		3456.9	31	Q	44	5118.74		3456.9	31	Q	43	4962.64
	3571.93	32	D	45	5104.73		3571.93	32	D	43	4990.69		3571.93	32	D	42	4834.59
	3700.02	33	K	44	4989.7		3700.02	33	K	42	4875.66		3700.02	33	K	41	4719.56
	3829.07	34	E	43	4861.61		3829.07	34	E	41	4747.56		3829.07	34	E	40	4591.46
	3886.09	35	G	42	4732.56		3886.09	35	G	40	4618.52		3886.09	35	G	39	4462.42
	3999.17	36	I	41	4675.54		3999.17	36	I	39	4561.5		3999.17	36	I	38	4405.4
	4096.23	37	P	40	4562.46		4096.23	37	P	38	4448.42		4096.23	37	P	37	4292.31
	4193.28	38	P	39	4465.41		4193.28	38	P	37	4351.36		4193.28	38	P	36	4195.26
	4308.3	39	D	38	4368.35		4308.3	39	D	36	4254.31		4308.3	39	D	35	4098.21
	4436.36	40	Q	37	4253.33		4436.36	40	Q	35	4139.28		4436.36	40	Q	34	3983.18
	4564.42	41	Q	36	4125.27		4564.42	41	Q	34	4011.22		4564.42	41	Q	33	3855.12
	4720.52	42	R	35	3997.21		4720.52	42	R	33	3883.17		4720.52	42	R	32	3727.07
	4833.61	43	L	34	3841.11		4833.61	43	L	32	3727.07		4833.61	43	L	31	3570.96
	4946.69	44	I	33	3728.02		4946.69	44	I	31	3613.98		4946.69	44	I	30	3457.88
	5093.76	45	F	32	3614.94		5093.76	45	F	30	3500.9		5093.76	45	F	29	3344.8
	5164.8	46	A	31	3467.87		5164.8	46	A	29	3353.83		5164.8	46	A	28	3197.73
	5221.82	47	G	30	3396.83		5221.82	47	G	28	3282.79		5221.82	47	G	27	3126.69
	5349.91	48	K	29	3339.81		5349.91	48	K	27	3225.77		5349.91	48	K	26	3069.67
	5477.97	49	Q	28	3211.72		5477.97	49	Q	26	3097.68		5477.97	49	Q	25	2941.57
	5591.06	50	L	27	3083.66		5591.06	50	L	25	2969.62		5591.06	50	L	24	2813.52
	5720.1	51	E	26	2970.58		5720.1	51	E	24	2856.53		5720.1	51	E	23	2700.43
	5835.13	52	D	25	2841.53		5835.13	52	D	23	2727.49		5835.13	52	D	22	2571.39
	5892.15	53	G	24	2726.51		5892.15	53	G	22	2612.46		5892.15	53	G	21	2456.36
	6048.25	54	R	23	2669.48		6048.25	54	R	21	2555.44		6048.25	54	R	20	2399.34
	6149.3	55	T	22	2513.38		6149.3	55	T	20	2399.34		6149.3	55	T	19	2243.24
	6262.38	56	L	21	2412.34		6262.38	56	L	19	2298.29		6262.38	56	L	18	2142.19
	6349.41	57	S	20	2299.25		6349.41	57	S	18	2185.21		6349.41	57	S	17	2029.11
	6464.44	58	D	19	2212.22		6464.44	58	D	17	2098.18		6464.44	58	D	16	1942.08
	6627.5	59	Y	18	2097.19		6627.5	59	Y	16	1983.15		6627.5	59	Y	15	1827.05
	6741.54	60	N	17	1934.13		6741.54	60	N	15	1820.09		6741.54	60	N	14	1663.99
	6854.63	61	I	16	1820.09		6854.63	61	I	14	1706.04		6854.63	61	I	13	1549.94
	6982.69	62	Q	15	1707		6982.69	62	Q	13	1592.96		6982.69	62	Q	12	1436.86
	7110.78	63	K	14	1578.94		7110.78	63	K	12	1464.9		7110.78	63	K	11	1308.8
	7239.82	64	E	13	1450.85		7239.82	64	E	11	1336.81		7239.82	64	E	10	1180.7
	7326.86	65	S	12	1321.81		7326.86	65	S	10	1207.76		7326.86	65	S	9	1051.66
	7427.9	66	T	11	1234.77		7427.9	66	T	9	1120.73		7427.9	66	T	8	964.63
	7540.99	67	L	10	1133.73		7540.99	67	L	8	1019.68		7540.99	67	L	7	863.582
	7678.05	68	H	9	1020.64		7678.05	68	H	7	906.6		7678.05	68	H	6	750.499
	7791.13	69	L	8	883.584		7791.13	69	L	6	769.541		7791.13	69	L	5	613.44
	7890.2	70	V	7	770.5		7890.2	70	V	5	656.457		7890.2	70	V	4	500.356
	8003.28	71	L	6	671.431		8003.28	71	L	4	557.388		8003.28	71	L	3	401.287
	8159.39	72	R	5	558.347		8159.39	72	R	3	444.304		8159.39	72	R	2	288.203
	8272.47	73	L	4	402.246		8272.47	73	L	2	288.203		---	73	L	1	132.102
	8428.57	74	R	3	289.162		---	74	R	1	175.119
	8485.59	75	G	2	133.061
	---	76	G	1	76.0393

[truncated: 6 more sheets: Acyl-CoA-binding protein, Glial fibrillary acidic proten , alpha 1 antichymotripsin frag, Tubulin alpha 1A chain frag, Histone H2A type 1-BE frag, Macrophage migration inhibitor ]
